# Supplementary material for: Mechanisms of Trained Innate Immunity in oxLDL Primed Human Coronary Smooth Muscle Cells
Source: PubMed Central journal article supplement (PMC6351498; doi:10.3389/fimmu.2019.00013), 2019-01-23
Supplement: Data_Sheet_1.pdf [file Data_Sheet_1.pdf]

## **Supplementary Material**

### **Mechanisms of Trained Innate Immunity in oxLDL Primed Human Coronary Smooth Muscle Cells**

Lucia Schnack, Yahya Sohrabi, Sina M. M. Lagache, Florian Kahles, Dennis Bruemmer, Johannes Waltenberger, Hannes M. Findeisen

Correspondence: Hannes M. Findeisen: [hannes.findeisen@ukmuenster.de](mailto:hannes.findeisen@ukmuenster.de)

## Supplementary Figures

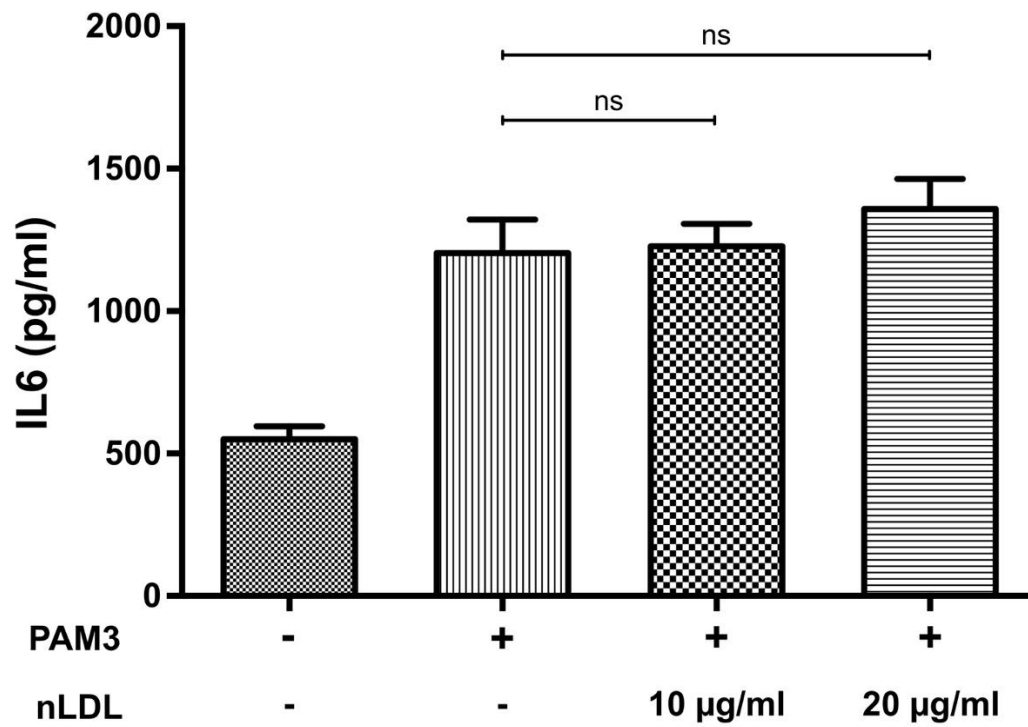

**Figure S1**

nLDL treatment does not induce priming in SMCs. Cells were treated 10 or 20 µg/ml nLDL for 24h. On day 5 cells were restimulated with 5 µg/ml PAM3cys4 for 24h and IL6 levels were analyzed in the supernatant. (\*  $p < 0.05$ , SEM, all experiments were repeated at least 3 times).

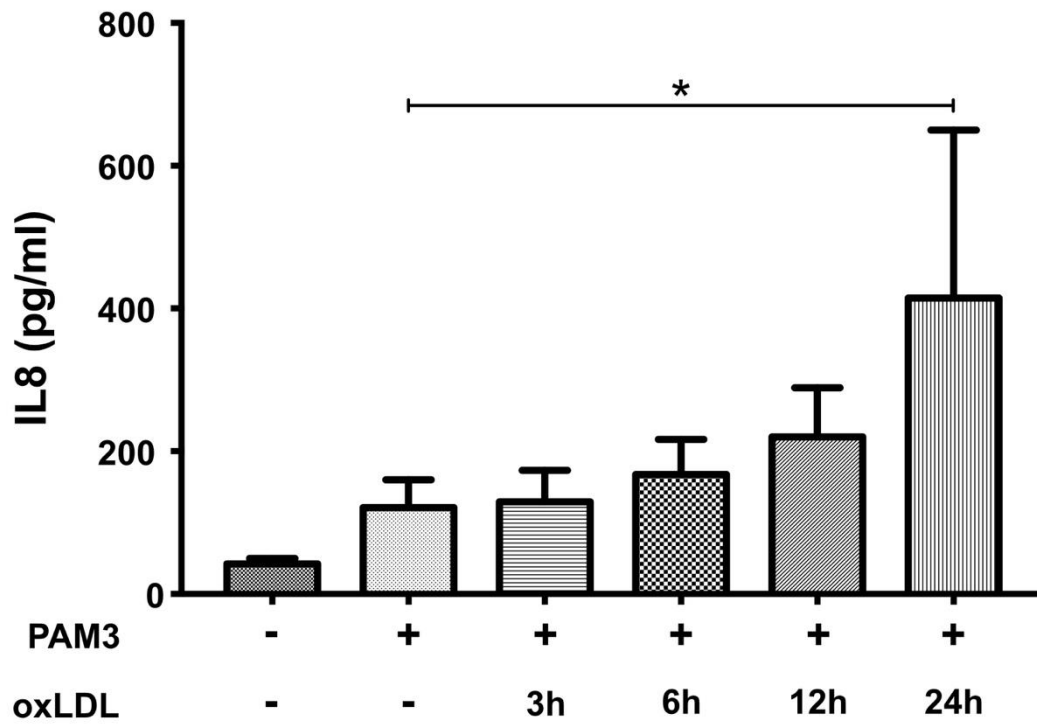

**Figure S2**

Levels of IL8 secretion upon restimulation in oxLDL-treated SMCs depend on the duration of priming. Cells were treated with 10  $\mu\text{g/ml}$  oxLDL for 3 up to 24h. On day 5 cells were restimulated with 5  $\mu\text{g/ml}$  PAM3cys4 for 24h and IL8 levels were analyzed in the supernatant. (\*  $p < 0.05$ , SEM, all experiments were repeated at least 3 times).

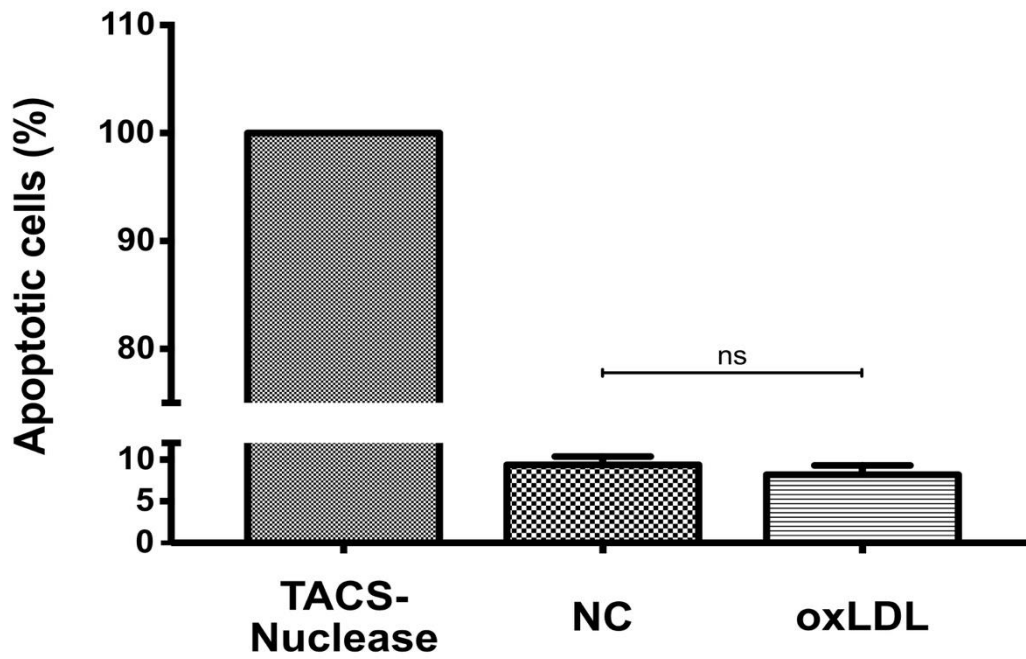

### Figures S3

Low dose oxLDL treatment does not induce apoptosis in SMCs. Cells were treated with 10  $\mu\text{g/ml}$  oxLDL for 24h or were left untreated (NC). On day 5 apoptosis was analyzed. TACS-Nuclease treated cells served as a positive control. (\*  $p < 0.05$ , SEM, all experiments were repeated at least 3 times).

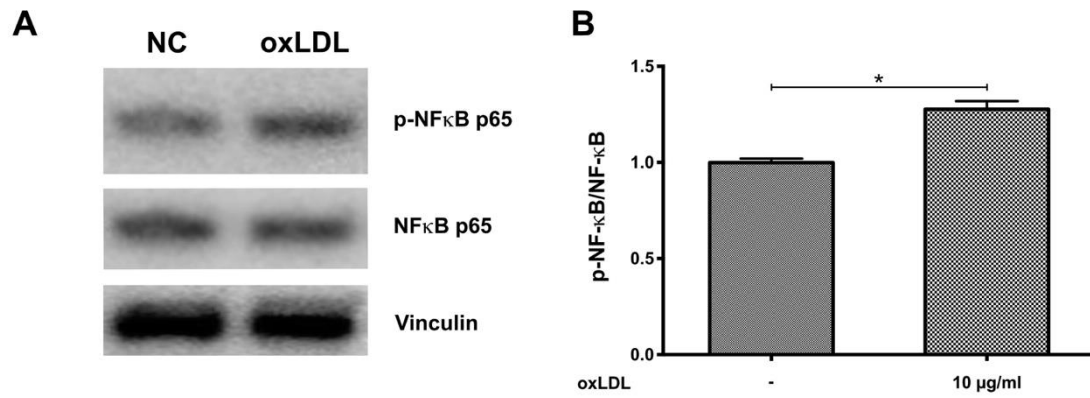

**Figure S4**

OxLDL priming induces phosphorylation of NFκB p65. Cells were treated with 10 μg/ml oxLDL for 4h and cell lysates were analyzed by western blot. (\*  $p < 0.05$ , SEM, all experiments were repeated at least 3 times).

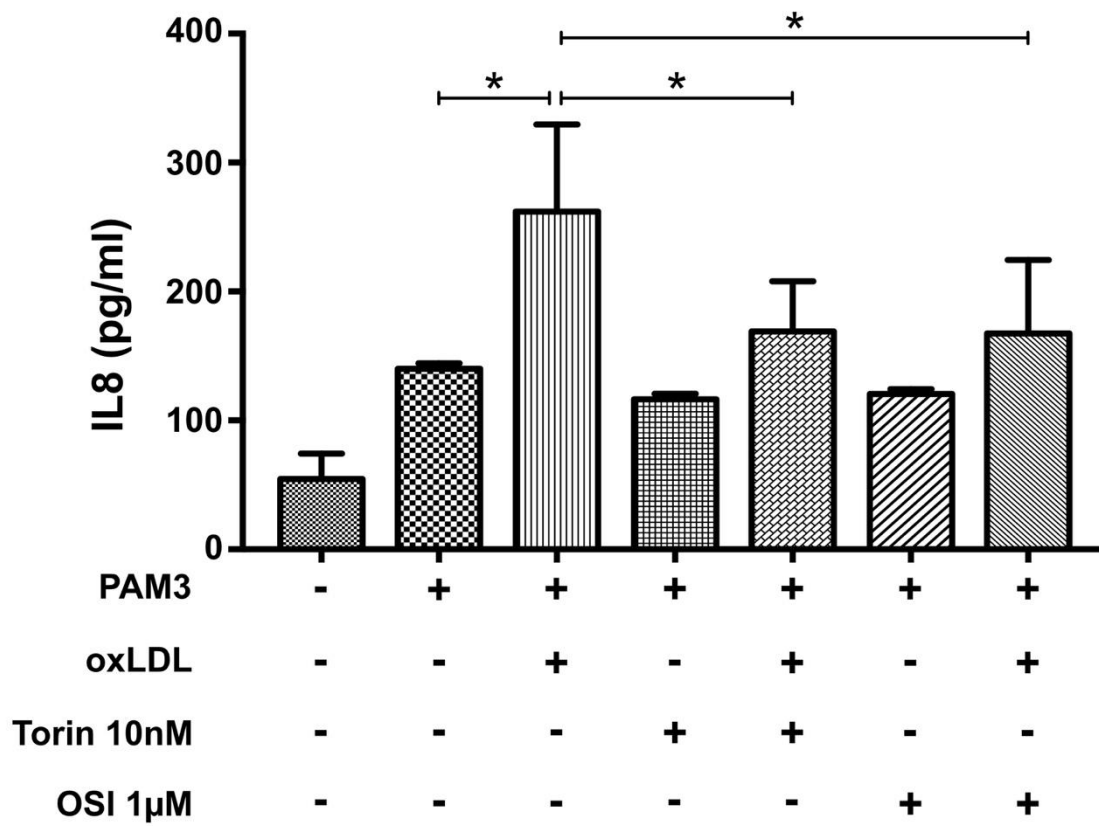

**Figure S5**

Inhibition of mTOR-signaling pathway blocks oxLDL Priming. SMCs were pretreated with 10 nM of the mTOR-inhibitor Torin1 or 1 µM of the mTOR-inhibitor OSI27 for 30 min, followed by 10 µg/ml oxLDL for 24h. Cells were restimulated on day 5 with 5 µg/ml PAM3cys4 for 24h and IL8 levels were analyzed in the supernatant. (\* p < 0.05, SEM, all experiments were repeated at least 3 times).

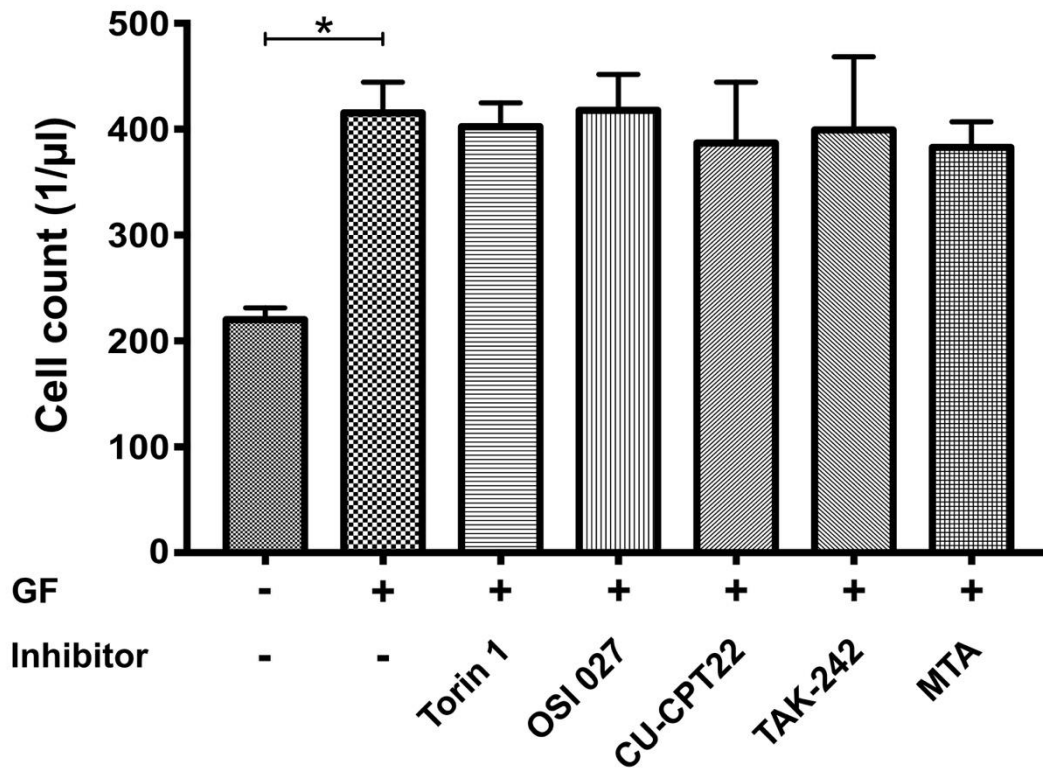

**Figure S6**

Proliferation of SMCs was not affected by the chemical inhibitors used in this study. Cells were treated with 10 nM of the mTOR-Inhibitor Torin1, 1 μM of the mTOR Inhibitor OSI27, 5 μM of the TLR2-inhibitor CU-CPT22, 1 μM of the TLR4-inhibitor TAK242 or 10 μM of the methyltransferase inhibitor MTA for 24h. On day 5 medium was changed to growth factors supplemented medium (GF), to stimulate proliferation. After 24h cell numbers were counted.

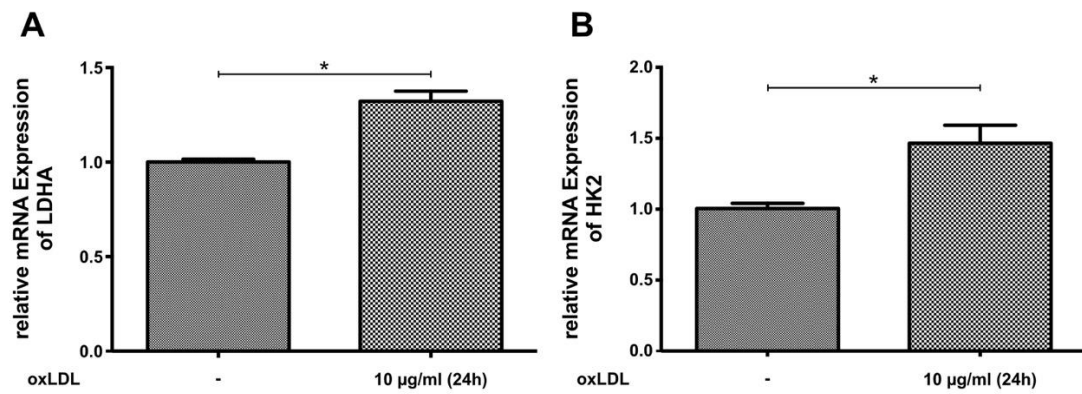

**Figure S7**

OxLDL priming leads to increased expression of HIF1 $\alpha$  target genes. SMCs were treated with 10  $\mu$ g/ml oxLDL for 12h. mRNA levels of LDHA (A) and HK2 (B) were analyzed by real-time PCR. (\*  $p < 0.05$ , SEM, all experiments were repeated at least 3 times).



**Real-time qPCR primer sequences**

| <b>Gene</b>       | <b>Forward primer</b>          | <b>Reverse primer</b>          |
|-------------------|--------------------------------|--------------------------------|
| hCD68             | GCTACATGGCGGTGGAGTACAA         | ATGATGAGAGGCAGCAAGATGG         |
| hMAC2             | GGCCACTGATTGTGCCTTAT           | AAGCGTGGGTAAAGTGGAAG           |
| hIL6              | AGTGCCTCT TTGCTGCTTTCAC        | TGACAAACAAATTCGGTACATC<br>CT   |
| hIL8              | ACTGAGAGTGATTGAGAGTGGAC        | AACCTCTGCACCCAGTTTTTC          |
| hMCP1             | GTGAGGAACAAGCCAGAGCTG          | TGCGCAGAATGAGATGAGTTG          |
| h $\alpha$ SMA    | AGCAGCTCCAGCTATGTGTGAAG<br>AAG | TTTGTCCCATTCCCACCATCACC<br>C   |
| TFIIB             | TCGCCACATTCGCTTCCTGCTTTC       | ATATCACCGGCTCTGTAGTCCTC<br>CAC |
| HSM22<br>$\alpha$ | GCAGATCATCAGTTAGAGCGGAG<br>AGG | AGTTACCATTGCTCAGTGACAGA<br>GCC |
| LDHA              | ATCTTGACCTACGTGGCTTGGA         | CCATACAGGCACACTGGAATCT<br>C    |
| HK2               | TTGACCAGGAGATTGACATGGG         | CAACCGCATCAGGACCTCA            |
